# Supplementary material for: SARS-CoV-2 severity in African Americans – a role for Duffy null?
Source: PubMed Central journal article supplement — Haematologica. 2020 Oct 5;105(12):2892. doi: 10.3324/haematol.2020.269415 (PMC7716376; doi:10.3324/haematol.2020.269415), 2020-10-05
Supplement: 2020_269415-Disclosures_Contributions.pdf [file 2020_269415-Disclosures_Contributions.pdf]

Haematologica  
HAEMATOL/2020/269415  
Version 3  
SARS-CoV-2 severity in african americans – A role for Duffy Null?

Robert P. Hebbel and Gregory M. Vercellotti

Disclosures: none

Contributions: both authors wrote this letter
